# Supplementary material
Source: PubMed Central journal article supplement (PMC9669107)
Supplement: NIHMS1826481-supplement-1826481_SI_guide.pdf [file NIHMS1826481-supplement-1826481_SI_guide.pdf]

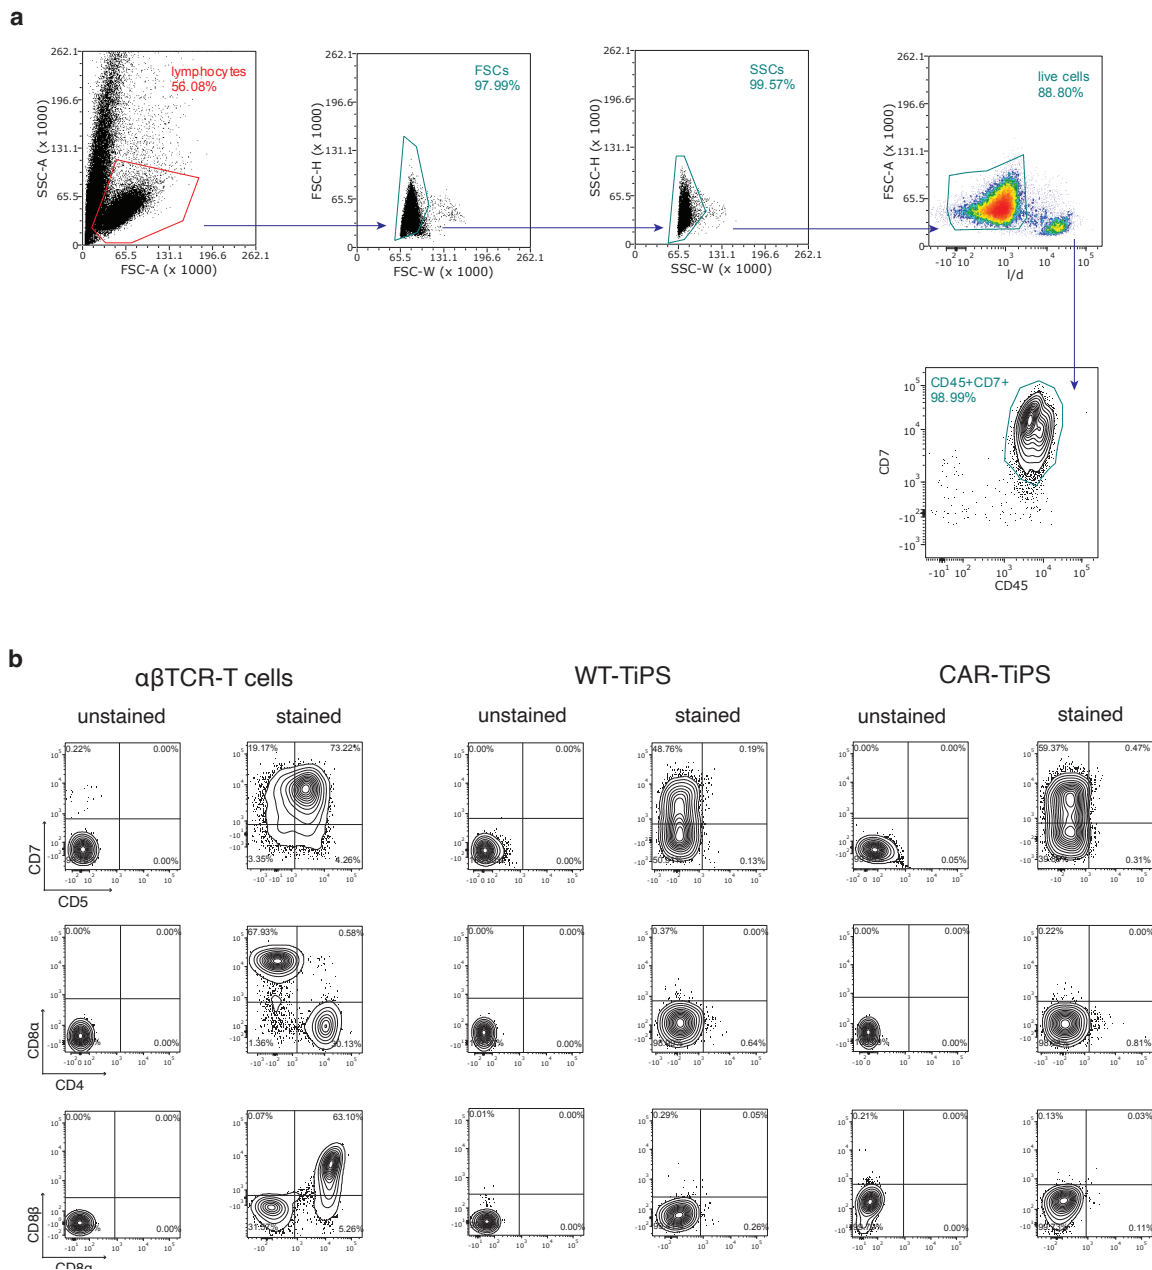

**Supplementary Fig. 1 | Flow-cytometry gating strategy for iT cell phenotype analysis. a**, Gating strategy applied to identify live, CD45+CD7+ iT cells. **b**, Gating strategy applied to identify CD4, CD8 $\alpha$  and CD8 $\beta$  expression levels. Gating is set based on stained PBMC controls (left panels) and stained in CD45+ lymphoid precursor cells (D20, WT-TiPS and CAR-TiPS respectively) to adjust for autofluorescence.
